# Supplementary material
Source: Springer Nature journal article supplement (https://www.springermedizin.de/resource/supplementary/13023_2012_390_MOESM6_ESM.pdf/9642250)

Age at  
diagnosis  
(years)

14-16

12-14

10-12

8-10

6-8

4-6

2-4

0-2

Male  
Female

60 50 40 30 20 10 0 10 20 30 40 50 60

Number of children

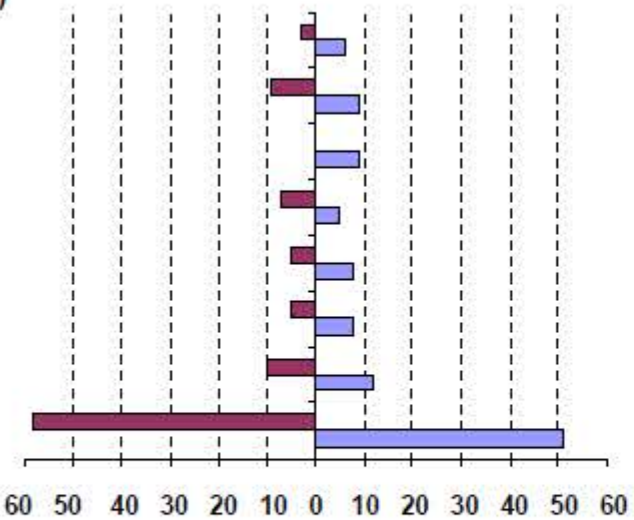

Supplement: MOESM6 [file 9642250]
